# Supplementary material for: Rhizobial infection does not require cortical expression of upstream common symbiosis genes responsible for the induction of Ca2+ spiking
Source: PubMed Central journal article supplement — Plant J. 2013 Nov 7;77(1):146–59. doi: 10.1111/tpj.12374 (PMC4253040; doi:10.1111/tpj.12374), 2013-11-07
Supplement: tpj0077-0146-SD2.pdf [file tpj0077-0146-SD2.pdf]

# 1 **Supporting experimental procedures**

2

## 3 **Methods S1**

### 4 **Plasmid construction**

5 For promoter-*GUS* analysis and complementation tests, Gateway compatible destination  
6 vectors, *pEpi168::GW-p35S::GFP* and *pEpi308::GW-p35S::GFP*, were constructed as  
7 follows: Genomic sequences of the *LjEXPA7* promoter regions (168 and 308 bp) were  
8 amplified by PCR. Each fragment was digested with *DraI* and *SpeI* and then inserted  
9 into the *HindIII* (blunt)-*SpeI* site of *p35S::GW-p35S::GFP* (*P35S:GFP-gw*; Banba *et al.*,  
10 2008). For the construction of the *pEpi400::GW-p35S::GFP* vector, the genomic  
11 sequence of the *LjEXPA8* promoter region (400 bp) was amplified by PCR. The  
12 fragment was digested with *HindIII* and *SpeI* and then ligated with  
13 *p35S::GW-p35S::GFP*. For co-transformation with *CCaMK* under the control of  
14 *pEpi308* and an inactive truncated *CCaMK* under the control of *p35S*, a Gateway  
15 compatible destination vector, *pEpi308::CCaMK-p35S::GW*, was constructed by  
16 introducing the reading frame cassette C.1 (RfC.1) of the Gateway vector conversion  
17 system (Invitrogen, Carlsbad, CA, USA) into the *XhoI* (blunt)-*XhoI* (blunt) site of  
18 *pEpi308::CCaMK-p35S::GFP*. All primer sets used for construction are listed in Table  
19 S2.

20 Information of entry clones of symbiotic genes and *GUSplus* (*GUS*<sup>+</sup>) and conversion  
21 of these entry vectors into *pEpi* destination vectors are described below. cDNA  
22 sequences of *NFR5* and *NUP85* were amplified by PCR and cloned into  
23 pENTR/D-TOPO (Invitrogen, Carlsbad, CA, USA). cDNA sequence of *NUP133* was  
24 amplified by PCR and digested with *SacII* and *AscI* and then inserted into the

1 SacII-AscI site of pENTR/D-TOPO. The entry clones constructed in this study, and  
2 entry clones of *GUS*<sup>+</sup> (Yano *et al.*, 2008), *NFR1* (Nakagawa *et al.*, 2011), *CASTOR*,  
3 *POLLUX*, *CCaMK*, *CCaMK*<sup>T265D</sup> (Banba *et al.*, 2008), an inactive truncated *CCaMK*  
4 (*CCaMK1-340*) (Shimoda *et al.*, 2012), *CYCLOPS* (Yano *et al.*, 2008), *NSP1* (Yokota *et*  
5 *al.*, 2010) and *NSP2* (Yokota *et al.*, 2010), were converted with the destination vector of  
6 *pEpi308::GW-p35S::GFP* by the LR reaction (Gateway LR clonase II Enzyme Mix;  
7 Invitrogen, Carlsbad, CA, USA).

8

## 9 **Methods S2**

### 10 **RNA isolation from root hairs**

11 Surface-sterilized seeds were germinated on sterilized filter paper on 1.5% agar  
12 containing half-strength B&D medium (Broughton and Dilworth 1971) in square plastic  
13 plates (Eiken Chemical Co., Tokyo, Japan, <http://www.eiken.co.jp/>). The plastic plates  
14 were incubated vertically for 2 days in a growth cabinet with a 16 h-day/8 h-night cycle  
15 at 24°C, and then the seedlings were inoculated with a suspension of DsRed-labeled *M.*  
16 *loti*. The plants were grown for an additional 2 days with the roots shielded from light.  
17 The roots were then collected and dropped immediately into a 100-ml stainless steel  
18 beaker filled with liquid nitrogen. The samples were stirred gently with a magnetic  
19 stirrer for 20 min. In this step, the root hairs were cut off from the roots. The liquid  
20 nitrogen containing root hairs was then filtered through a stainless testing sieve with a  
21 mesh aperture of 500 µm. Liquid nitrogen was evaporated in a 50-mL sample tube and  
22 root hairs were collected. The roots trapped by the testing sieve were also collected, as  
23 “stripped roots”. Total RNAs were isolated by the CTAB method (Chang *et al.*, 1993)  
24 with some modifications. Briefly, the collected root hairs or stripped roots were ground

1 to a fine powder in liquid nitrogen, immediately dissolved in the extraction solution (2%  
2 CTAB, 100 mM Tris pH 9.5, 20 mM EDTA, 1.4 M NaCl, 1% 2-mercaptoethanol), and  
3 then incubated at 65°C for 10 min. After two successive extractions with chloroform,  
4 RNAs were precipitated using LiCl (final concentration 2.5 M) at -20°C overnight. The  
5 precipitated RNAs were collected by centrifugation, and were dissolved in distilled  
6 water. As necessary, the samples were further purified using an RNeasy Mini Kit  
7 (Qiagen, <http://www.qiagen.com/>) according to the manufacturer's instructions.

8

## 9 **References**

10 **Banba, M., Gutjahr, C., Miyao, A., Hirochika, H., Paszkowski, U., Kouchi, H. and**  
11 **Imaizumi-Anraku, H.** (2008) Divergence of evolutionary ways among common *sym*  
12 genes: CASTOR and CCaMK show functional conservation between two symbiosis  
13 systems and constitute the root of a common signaling pathway. *Plant Cell Physiol.*, **49**,  
14 1659-1671.

15 **Broughton, W.J. and Dilworth, M.J.** (1971) Control of leghaemoglobin synthesis in  
16 snake beans. *Biochem. J.*, **125**, 1075-1080.

17 **Chang, S., Puryear, J. and Cairney, J.** (1993) A simple and efficient method for  
18 isolating RNA from pine trees. *Plant Mol. Biol. Rep.*, **11**, 113-116.

19 **Nakagawa, T., Kaku, H., Shimoda, Y., Sugiyama, A., Shimamura, M., Takanashi,**  
20 **K., Yazaki, K., Aoki, T., Shibuya, N. and Kouchi, H.** (2011) From defense to  
21 symbiosis: limited alterations in the kinase domain of LysM receptor-like kinases are  
22 crucial for evolution of legume-*Rhizobium* symbiosis. *Plant J.*, **65**, 169-180.

- 1 **Yokota, K., Soyano, T., Kouchi, H. and Hayashi, M.** (2010) Function of GRAS
- 2 proteins in root nodule symbiosis is retained in homologs of a non-legume, rice. *Plant*
- 3 *Cell Physiol.*, **51**, 1436-1442.
