# Supplementary material for: Rhizobial infection does not require cortical expression of upstream common symbiosis genes responsible for the induction of Ca2+ spiking
Source: PubMed Central journal article supplement — Plant J. 2013 Nov 7;77(1):146–59. doi: 10.1111/tpj.12374 (PMC4253040; doi:10.1111/tpj.12374), 2013-11-07
Supplement: tpj0077-0146-SD4.pdf [file tpj0077-0146-SD4.pdf]

Table S1. Spontaneous nodulation phenotypes.

| <i>Lotus</i> line | Construct                       | Spontaneous nodulation phenotype     |      |                                          | Total plant |
|-------------------|---------------------------------|--------------------------------------|------|------------------------------------------|-------------|
|                   |                                 | Spontaneous nodulation phenotype (%) |      | Sp nodules / nodulated plant ( $\pm$ SE) |             |
|                   |                                 | Bump                                 | SpN  |                                          |             |
| wt                | <i>pEpi::CCaMK<sup>TT</sup></i> | 0                                    | 0    | -                                        | 32          |
| wt                | <i>pEpi::CCaMK<sup>TD</sup></i> | 0                                    | 0    | -                                        | 47          |
| wt                | <i>p35S::CCaMK<sup>TT</sup></i> | 0                                    | 0    | -                                        | 18          |
| wt                | <i>p35S::CCaMK<sup>TD</sup></i> | 7.4                                  | 88.9 | 3.6 ( $\pm$ 0.7)                         | 27          |

The numbers indicate the ratio of the number of plants that showed spontaneous nodulation events, i.e., formation of small bump-like structures (Bump) or spontaneous nodules (SpN) in the cortex, to the total number of plants 6 weeks after transplantation. Numerals in parentheses indicate the numbers of spontaneous nodules (Sp nodules) as averages ( $\pm$ SE) of nodulated plants. Data were compiled from more than two independent experiments. wt, Gifu B-129; *pEpi*, promoter Epi308; *p35S*, promoter CaMV 35S; *CCaMK<sup>TT</sup>*, wt-*CCaMK*; *CCaMK<sup>TD</sup>*, *CCaMK<sup>T265D</sup>*

---

Table S2. Primer sequences used for construction.

---

| Primer name       |         | Sequence (from 5' to 3')       |
|-------------------|---------|--------------------------------|
| DraI_p168-fw      | forward | gctttaaAAGAAAGTAATCTTGTTGAC    |
| DraI_p308-fw      | forward | gctttaaAAAGTATGAGACCTAGAAA     |
| SpeI_p168/p308-rv | reverse | gcactagtGGTTAAGCTTCTGGCTAT     |
| HindIII_p400-fw   | forward | cccaagcttGGTCGGTGGTTGA         |
| SpeI_p400-rv      | reverse | atactagtGGTTGTTGGTGTGCTAGCTG   |
| caccCCaMK-fw      | forward | caccATGGGATATGATCAAACCAGAA     |
| CCaMK-rv          | reverse | CTATGATGGACGAAGAGAAG           |
| caccNFR5-fw       | forward | caccTTATTGATATACTAAACCACAGGAT  |
| NFR5-rv           | reverse | GGAACGACGTATACGACTTC           |
| caccNUP85-fw      | forward | caccATGCCCTCCGACACAGTC         |
| NUP85-rv          | reverse | CTATTCATCAAGTATAGCACGACCA      |
| SacII_NUP133-fw   | forward | caccgcggATGTTTTTCGTGTGGAACGAAG |
| AscI_NUP133-rv    | reverse | ggcgcgcCTATTCCATGGGAGAAGGCC    |

---

Lower case characters indicate engineered sequences including restriction sites or D-TOPO recognition site.

---

Table S3. Primer sequences used in the expression analysis.

| Gene name        |         | Sequence (from 5' to 3')  |
|------------------|---------|---------------------------|
| <i>Ubiquitin</i> | forward | ATGCAGATCTTCGTCAAGACCTTG  |
|                  | reverse | ACCTCCCCTCAGACGAAG        |
| <i>EXPA7</i>     | forward | GCCTCCACTAGTAGCTGGCATA    |
|                  | reverse | CAACGTCGAGCTCAATGCAG      |
| <i>EXPA8</i>     | forward | GCTGTGGTATTTTCGACCCAGT    |
|                  | reverse | TAGCGTCGAGCTTAAAGCCAC     |
| <i>RH101</i>     | forward | GCTAACGCCATGGTCAAGATG     |
|                  | reverse | GGAATCACACAGTTTGGCAATG    |
| <i>RH102</i>     | forward | CGCAGCTCAAACAAAGAAAGC     |
|                  | reverse | GCTGTAACAATTCCTGCAGAGTTG  |
| <i>NFR1</i>      | forward | CCAGAAGAAGGAAGAAGAGAAAGCT |
|                  | reverse | CCAGAAGTTTCATATTCTGCACTAC |
| <i>NFR5</i>      | forward | GGTGGTTATGCTGTGGAAGG      |
|                  | reverse | TCCATCCATTTTCTGATCCTC     |
| <i>NUP85</i>     | forward | CAATTGCCACGAAATGTGAG      |
|                  | reverse | CAGGTAGCCATGCTTGAGA       |
| <i>NUP133</i>    | forward | TCCCTGGACTCCTCGCTTATCTGT  |
|                  | reverse | ACGCGCAGCCTTCAACGGG       |
| <i>CASTOR</i>    | forward | ATGGTGGCCTTGACATAAG       |
|                  | reverse | AGTGACGACGTATAACAGCA      |
| <i>POLLUX</i>    | forward | TTACTCTCCTGGTTCTCTTCC     |
|                  | reverse | AGGTATCCTAGGGAAAAAGC      |
| <i>CCaMK</i>     | forward | TCTTGTGCTGGAGCTTTGTTCT    |
|                  | reverse | AGCCTTGTGAACCGCCTCT       |
| <i>CYCLOPS</i>   | forward | GCTGGCAGATGAAAAAGAGC      |
|                  | reverse | GCGTGTTTGAGCACAAACATT     |
| <i>SYMRK</i>     | forward | TGAATGGAATTCTTTTGATTCTG   |
|                  | reverse | TCACTTGCACTTGACCCAGA      |
| <i>NSP1</i>      | forward | GAGGTCGAGCTTTGTTGAGG      |
|                  | reverse | ATTCCCATCCAGCTTCCAC       |
| <i>NSP2</i>      | forward | CATCGACTCCATGATTGACG      |
|                  | reverse | GGTTGTTGTTGTCGTGGTTG      |
| <i>NIN</i>       | forward | TGGATCAGCTAGCATGGAAT      |
|                  | reverse | TCTGCTTCTGCTGTTGTCAC      |
